# Supplementary material
Source: HighWire-hosted journal article supplement (https://www.cmajopen.ca/highwire/filestream/81371/field_highwire_adjunct_files/0/2019-0162-original-submission.pdf)
Supplement: 2019-0162-original-submission.pdf [file 2019-0162-original-submission.pdf]

1  
2  
3  
4 **Peripheral arterial disease in Ontario First Nations people**  
5  
6  
7 **with diabetes: a longitudinal population-based cohort study**  
8  
9

10  
11 Baiju R Shah MD PhD<sup>1,2,3</sup>

12  
13 Eliot Frymire MA BEd<sup>1,4</sup>

14  
15 Kristen Jacklin PhD<sup>5</sup>

16  
17 Carmen Jones<sup>6</sup>

18  
19 Shahriar Khan MSc<sup>1</sup>

20  
21 Morgan Slater PhD<sup>1,7</sup>

22  
23 Jennifer D Walker PhD<sup>1,8</sup>

24  
25 Michael E Green MD MPH<sup>1,4,7,9</sup>

26  
27  
28  
29 <sup>1</sup> ICES, Toronto, Ontario

30  
31 <sup>2</sup> Division of Endocrinology, Sunnybrook Health Sciences Centre, Toronto, Ontario

32  
33 <sup>3</sup> Department of Medicine, University of Toronto, Ontario

34  
35 <sup>4</sup> Health Services and Policy Research Institute, Queen's University, Kingston, Ontario

36  
37 <sup>5</sup> Memory Keepers Medical Discover Team, Department of Family Medicine and Biobehavioral  
38  
39 Health, University of Minnesota Medical School, Duluth, Minnesota

40  
41 <sup>6</sup> Chiefs of Ontario, Toronto, Ontario

42  
43 <sup>7</sup> Department of Family Medicine, Queen's University, Kingston, Ontario

44  
45 <sup>8</sup> School of Rural and Northern Health, Laurentian University, Sudbury, Ontario

46  
47 <sup>9</sup> Department of Family Medicine, Kingston Health Sciences Centre

48  
49  
50  
51 Correspondence to: Baiju R Shah, Sunnybrook Health Sciences Centre, G106 – 2075 Bayview  
52  
53 Avenue, Toronto M4N 3M5. baiju.shah@ices.on.ca, tel 416-480-4706, fax 416-480-6048  
54  
55  
56  
57  
58  
59  
60

1  
2  
3 Funding: This study was support by an Ontario SPOR Support Unit IMPACT Award. Additional  
4 support was provided by Dr. Green through the Brian Hennen Chair in Family Medicine, Dr.  
5 Walker through a Tier 2 Canada Research Chair in Indigenous Health, and ICES. ICES is  
6 funded by an annual grant from the Ontario Ministry of Health and Long-Term Care (MOHLTC).  
7  
8  
9  
10

11  
12 Competing Interests: none to declare  
13  
14  
15  
16  
17  
18  
19  
20  
21  
22  
23  
24  
25  
26  
27  
28  
29  
30  
31  
32  
33  
34  
35  
36  
37  
38  
39  
40  
41  
42  
43  
44  
45  
46  
47  
48  
49  
50  
51  
52  
53  
54  
55  
56  
57  
58  
59  
60

Confidential

## Abstract

Background: Peripheral arterial disease is an important vascular complication of diabetes. It may lead to amputation, which significantly impacts patients' quality of life. First Nations people in Ontario have a significant and growing burden of diabetes.

Methods: Using healthcare administrative databases, we identified annual cohorts from 1995 to 2014 of all people in Ontario with diabetes, and identified those who were First Nations using the Indian Register. We identified angiography, revascularization procedures and amputations and each population, and then determined the mortality rate in those who had an amputation.

Results: First Nations people received angiography procedures at a slightly higher rate to other people in Ontario, while their rate of revascularization was comparable. However, they had amputations at 3- to 5-times the frequency of other Ontario residents. First Nations people had increased mortality after amputation (adjusted hazard ratio 1.15, 95% confidence interval 1.05 to 1.26), with median survival of only 3.5 years.

Interpretation: First Nations people in Ontario had a markedly increased risk for amputation compared to other Ontario residents, and their mortality rate after amputation was 15% higher.

## Introduction

Peripheral arterial disease (PAD) is an important vascular complication of diabetes. More than one in five people with symptomatic PAD have diabetes. (1) The most common symptom of PAD is intermittent claudication, but over one half of patients have other atypical symptoms, with reduced activity and impaired quality of life. (2) PAD can progress to critical limb ischemia which is characterized by rest pain, tissue loss or gangrene. As a result, PAD can lead to lower-extremity amputation, which is one of the most feared complications of diabetes and significantly impacts quality of life. (3),(4) In fact, more than 80% of lower-extremity amputations in Canada occur in patients with diabetes. (5) As a marker for generalized atherosclerosis, PAD also portends other cardiovascular disease such as myocardial infarction or stroke.

First Nations people in Ontario have a significant and growing prevalence of diabetes that exceeds that of other people in the province. (6) Previous research has also suggested that First Nations people have a disproportionate burden of PAD. (7) For example, a physical examination screening study in a northern Manitoba First Nations community found a 41% prevalence of impaired pulses and a 15% prevalence of foot ulcer history. (8) The objective of this study was to compare the diagnosis, treatment and complications of PAD between First Nations people and other people in Ontario living with diabetes.

## Methods

ICES maintains comprehensive linked administrative datasets related to Ontario's single payer publicly funded healthcare system. The general approach to cohort creation, description of the major data sets used and a description of the characteristics of the study cohorts are described in detail elsewhere. (9) In brief, we examined annual cohorts of all individuals with diagnosed diabetes in Ontario, and identified those who were First Nations using the Indian Register.

1  
2  
3 Using the Discharge Abstracts Database of all hospital admissions in Ontario, we examined  
4 age- and sex-adjusted rates for lower-extremity angiography to diagnose PAD, and for  
5 revascularization procedures (angioplasty or bypass) to treat PAD, in each fiscal year between  
6 2002 and 2014. We then examined age- and sex-adjusted rates of lower-extremity amputations  
7 in each fiscal year between 1995 and 2014. They were separated into minor (toe or foot) or  
8 major (at the ankle, below the knee or above the knee), and excluded any procedures where the  
9 diagnosis recorded on the same hospitalization was for malignant or benign lower-extremity  
10 tumours, trauma, frostbite or burns. We also examined age-adjusted rates for men and women  
11 separately, and sex-adjusted rates by age, in fiscal year 2014 only.  
12  
13

14 We then analyzed all individuals who had major amputations between 2002 and 2014, and  
15 followed them forward until March 2018 for the outcome of all-cause mortality. We counted the  
16 first amputation during the time period in individuals who had more than one. We compared  
17 First Nations people with other people in Ontario using a Cox proportional hazards model,  
18 adjusting for age and sex, with censoring on loss of Ontario healthcare coverage. The adjusted  
19 survival curve was plotted.  
20  
21

22 Analyses were conducted using SAS Enterprise Guide version 7.1 (Cary, NC). The project was  
23 approved by the Chiefs of Ontario Data Governance Committee. The study also received  
24 research ethics review from Queen's University and Laurentian University.  
25  
26

## 27 **Results**

28 The demographic characteristics of the population under study are described separately. (6)  
29 Table 1 shows the characteristics of the annual cohort from two years, 2002 and 2014. First  
30 Nations people with diabetes have a greater proportion of females and are younger than other  
31 people in Ontario with diabetes, and are more likely to live in rural areas.  
32  
33  
34  
35  
36  
37  
38  
39  
40  
41  
42  
43  
44  
45  
46  
47  
48  
49  
50  
51  
52  
53  
54  
55  
56  
57  
58  
59  
60

1  
2  
3 Figure 1A shows the age- and sex-adjusted rate of lower-extremity angiography procedures.  
4  
5 These procedures have decreased in frequency over time among both First Nations and other  
6  
7 people in Ontario. Figure 1B shows the rates of revascularization procedures, including both  
8  
9 angioplasty and bypass surgery. Figure 1C shows the age- and sex-adjusted rates of lower-  
10  
11 extremity amputation. In both populations and across time, about half of all amputations were  
12  
13 minor (toe or foot) and half were major (ankle or higher). (10) Figure 2 shows the amputation  
14  
15 rates by age and sex for 2014 only.  
16  
17

18  
19 We then followed the 12,847 individuals who had a major amputation between 2002 and 2014.  
20  
21 Figure 3 demonstrates their survival. Mortality risk after amputation was very high, with a  
22  
23 median survival of 3.5 years among First Nations people, and 4.1 years among other people.  
24  
25 The age- and sex-adjusted hazard ratio for mortality among First Nations people was 1.15 (95%  
26  
27 confidence interval 1.05 to 1.26,  $p=0.002$ ) compared to other Ontario people.  
28  
29

## 30 31 Interpretation

32  
33  
34 First Nations people with diabetes received lower-extremity angiography procedures to  
35  
36 diagnose PAD at a rate only slightly higher than that of other people in Ontario. The decline in  
37  
38 angiography use over time in both populations likely reflects increasing use of newer  
39  
40 technologies such as CT or MR angiography, which were not captured in this study. Similarly,  
41  
42 First Nations people undergo revascularization procedures to treat PAD at comparable rates.  
43  
44 However, their rate of lower-extremity amputation, a devastating outcome for patients with PAD,  
45  
46 is 3- to 5-fold higher than that of other people in Ontario. These discordant findings suggest that  
47  
48 PAD may be underdiagnosed or undertreated among First Nations people with diabetes, so  
49  
50 many patients may not come to medical attention until irreversible complications have already  
51  
52 occurred, necessitating amputation. Amputation rates were increased in males compared to  
53  
54 females among both First Nations people and other people in Ontario. Amputation rates  
55  
56  
57  
58  
59  
60

1  
2  
3 increased with age, and it was in the youngest age group ( $\leq 44$  years) where First Nations  
4 people had the greatest disparity, with amputation occurring more than 6 times as frequently  
5 than in other people in Ontario. This increased risk attenuated by age  $\geq 65$  years but was still  
6 nearly 4-fold. Amputation was strongly predictive of mortality, with median survival of only 3.5  
7 years after amputation among First Nations people, 0.6 years shorter than among other people  
8 in Ontario.  
9  
10  
11  
12  
13  
14  
15  
16

17 The etiology for this high burden of amputation may be driven in part by the high prevalence of  
18 many of the risk factors for PAD, including smoking and hypertension. (11) Yet, the magnitude  
19 of incremental risk for other macrovascular complications of diabetes faced by First Nations  
20 people, including coronary artery disease and stroke, (12),(13) is not nearly as dramatic as it is  
21 for amputation. Therefore, they are likely other factors contributing to this risk. For example,  
22 First Nations people may face barriers to screening for milder degrees of PAD, resulting in  
23 missed opportunities for early intervention and presentation with more advanced disease. A  
24 previous study found that First nations amputation rates in Manitoba varied by specialist  
25 consultation rate and by tribal council, suggesting that healthcare access may be an important  
26 factor. (14) In addition, First Nations people may have an increased risk for distal  
27 polyneuropathy as a complication of diabetes, which would increase the risk of foot ulcers that  
28 could eventually necessitate amputation. Unfortunately, this was not an outcome that could be  
29 ascertained using our data.  
30  
31  
32  
33  
34  
35  
36  
37  
38  
39  
40  
41  
42  
43  
44

45 Our results corroborate previous research from Alberta, that found an approximately 3-fold  
46 increased risk of amputation for First Nations people compared to non-First Nations people. (15)  
47 Previous research has found that lower socioeconomic status is an important independent  
48 predictor of amputation in people with diabetes in Ontario, (16) and First Nations people have  
49 marked disparities in socioeconomic measures. (17),(18) However, a Manitoba study of First  
50 Nations people found that average income at the tribal council level was not associated with  
51  
52  
53  
54  
55  
56  
57  
58  
59  
60

1  
2  
3 amputation rates. (14) A Manitoba study found that First Nations people were more likely to  
4 require amputation for an emergent indication (such as gangrene or nonhealing foot ulcer), but  
5 there was no difference in perioperative morbidity or long-term mortality. (19) Another Manitoba  
6 study compared outcomes for patients undergoing amputation between First Nations and Métis  
7 people with non-Indigenous people. (20) Rehabilitation utilization and duration were similar, but  
8 First Nations/Métis people were less likely to experience phantom pain post-amputation. We  
9 were not able to examine rehabilitation utilization in our study.  
10  
11  
12  
13  
14  
15  
16  
17  
18

19 This study has many important strengths. The study was a participatory research collaboration  
20 between academics and representatives of First Nations communities, who were involved  
21 throughout the study. In addition, we conducted a population-based study of all people across  
22 Ontario, and used provincial healthcare administrative databases that capture all outcome  
23 events with no missing data. Thus, the study had sufficient sample size to be adequately  
24 powered to examine rare events such as amputation. However, there are some important  
25 limitations to highlight. Using administrative data, we were only able to identify angiography as a  
26 diagnostic test for PAD. Other diagnostic tests, such as ultrasound, CT or MRI could not be  
27 identified as diagnostic tests specifically for PAD using the available data. In addition, we could  
28 only identify major surgical procedures for PAD: revascularization and amputation. Less severe  
29 manifestations of PAD, such as symptoms of impaired circulation, foot ulcers, or arterial  
30 blockages not suitable for intervention could not be ascertained. In addition, the data on  
31 diagnostic testing or surgical procedures will undercount procedures for Ontarians living in the  
32 northwest of the province, where specialist services may be referred to Winnipeg, Manitoba. As  
33 a result, we may have underestimated the procedural or surgical rates among those living in this  
34 area, which includes a large population of First Nations people.  
35  
36  
37  
38  
39  
40  
41  
42  
43  
44  
45  
46  
47  
48  
49  
50  
51  
52

53 In summary, although First Nations people with diabetes have comparable rates of procedures  
54 to diagnose and treat PAD as other people with diabetes in Ontario, they have a markedly  
55  
56  
57  
58  
59  
60



1  
2  
3 increased risk for amputation. This increased risk is particularly striking amongst younger  
4 people. These discordant results suggest that PAD is underdiagnosed or undertreated among  
5 First Nations people in Ontario. Amputation markedly impacts quality of life, and is associated  
6 with a very high mortality rate that is 15% higher for First Nations people compared to other  
7 people in Ontario. These results demonstrate the health inequities faced by First Nations  
8 people, and the impact of social, economic and cultural determinants of health. (17) Future  
9 research is needed to understand what barriers First Nations people face to receive adequate  
10 PAD care, and what interventions are necessary to achieve equitable PAD outcomes for First  
11 Nations people in Ontario.  
12  
13  
14  
15  
16  
17  
18  
19  
20  
21

## 22 **Acknowledgements**

23  
24  
25  
26  
27 Our partner through the early design, implementation and final dissemination of this project is  
28 the Chiefs of Ontario. Their many member contributions were key to the content and quality of  
29 the project. The authors also acknowledge the members of the Patient Advisory Committee for  
30 providing insightful and thoughtful input; their advice made a significant contribution in shaping  
31 the work. For a complete listing of the specific members of the Committee, see [insert ICES  
32 Atlas citation]. We also wish to acknowledge the First Nations individuals from Big Grassy River,  
33 Alderville First Nation, Caldwell First Nation, Six Nations of the Grand River and Moose Cree  
34 First Nation living with diabetes who shared their personal experiences. The authors would also  
35 like to thank Sue Schultz and Rahim Moineddin for their contributions.  
36  
37  
38  
39  
40  
41  
42  
43  
44  
45

46  
47 Parts of this material are based on data and information compiled and provided by: MOHLTC,  
48 Cancer Care Ontario, and the Canadian Institute of Health Information. The analyses,  
49 conclusions, opinions and statements expressed herein are solely those of the authors and do  
50 not reflect those of the funding or data sources; no endorsement is intended or should be  
51 inferred.  
52  
53  
54  
55  
56  
57  
58  
59  
60

## References

- 1 Murabito JM, D'Agostino RB, Silbershatz H, Wilson Peter WF. Intermittent claudication: A risk profile from the Framingham Heart Study. *Circulation* 1997;96(1):44-9.
- 2 Hiatt WR. Medical treatment of peripheral arterial disease and claudication. *New Engl J Med* 2001;344(21):1608-21.
- 3 Zhang P, Brown MB, Bilik D, Ackermann RT, Li R, Herman WH. Health utility scores for people with type 2 diabetes in U.S. managed care health plans. *Diabetes Care* 2012;35(11):2250.
- 4 O'Reilly DJ, Xie F, Pullenayegum E, Gerstein HC, Greb J, Blackhouse GK, et al. Estimation of the impact of diabetes-related complications on health utilities for patients with type 2 diabetes in Ontario, Canada. *Qual Life Res* 2011;20(6):939-43.
- 5 Kayssi A, de Mestral C, Forbes TL, Roche-Nagle G. A Canadian population-based description of the indications for lower-extremity amputations and outcomes. *Can J Surg* 2016;59(2):99-106.
- 6 Walker JD. Diabetes prevalence and incidence in First Nations people in Ontario: a cohort study using linked administrative data. *CMAJ* 2019;Under review.
- 7 Bonneau C, Caron NR, Hussain MA, Kayssi A, Verma S, Al-Omran M. Peripheral artery disease among Indigenous Canadians: What do we know? *Can J Surg* 2018;61(5):305-10.
- 8 Reid KS, Martin BD, Duerksen F, Nicolle LE, Garrett M, Simonsen JN, et al. Diabetic foot complications in a northern Canadian Aboriginal community. *Foot Ankle Int* 2006;27(12):1065-73.

- 1  
2  
3 9 Slater M. Reducing the burden of diabetes in First Nations people in Ontario: methods for  
4 a longitudinal population-based cohort study. CMAJ Open 2019;Under review.  
5  
6  
7  
8  
9 10 Green ME, Jones C, Walker JD, Shah BR, Khan S, Slater M, et al. First Nations and  
10 Diabetes in Ontario. Toronto, ON: ICES; 2019. Forthcoming.  
11  
12  
13 11 Rosella LC. Characterizing risk for type 2 diabetes in First Nations people living on-reserve  
14 in Ontario, Canada using population-based survey data. CMAJ 2019;Under review.  
15  
16  
17  
18 12 Chu A. Trends in cardiovascular care and event rates among First Nations and other  
19 people in Ontario, 1996-2015. CMAJ 2019;Under review.  
20  
21  
22  
23 13 Kapral MK. Stroke incidence, care and outcomes in First Nations people with diabetes in  
24 Ontario. CMAJ 2019;Under review.  
25  
26  
27  
28  
29 14 Martens PJ, Martin BD, O'Neil JD, MacKinnon M. Diabetes and adverse outcomes in a  
30 First Nations population: associations with healthcare access, and socioeconomic and  
31 geographical factors. Can J Diabetes 2007;31(3):223-32.  
32  
33  
34  
35 15 Alberta Health. Lower leg amputations among Albertans with Diabetes. Website  
36 2017Available from: URL: [http://www.afnigc.ca/main/includes/media/pdf/fnhta/HTAFN-](http://www.afnigc.ca/main/includes/media/pdf/fnhta/HTAFN-2017-03-07-Diabetes_Amputations.pdf)  
37  
38  
39  
40  
41  
42  
43  
44 16 Amin L, Shah BR, Bierman AS, Lipscombe LL, Wu CF, Feig DS, et al. Gender differences  
45 in the impact of poverty on health: disparities in risk of diabetes-related amputation. Diab  
46  
47  
48  
49  
50  
51 17 King M, Smith A, Gracey M. Indigenous health part 2: the underlying causes of the health  
52  
53  
54  
55  
56  
57  
58  
59  
60

- 1  
2  
3 18 Anand SS, Yusuf S, Jacobs R, Davis AD, Yi Q, Gerstein H, et al. Risk factors,  
4 atherosclerosis, and cardiovascular disease among Aboriginal people in Canada: the  
5 Study of Health Assessment and Risk Evaluation in Aboriginal Peoples (SHARE-AP).  
6 Lancet 2001;358(9288):1147-53.  
7  
8  
9  
10  
11  
12 19 Goulet S, Trepman E, Cheang M, Koulack J, Fong H, Duerksen F, et al. Revascularization  
13 for peripheral vascular disease in Aboriginal and non-Aboriginal patients. J Vasc Surg  
14 2006;43(4):735-41.  
15  
16  
17  
18  
19  
20 20 Meatherall BL, Garrett MR, Kaufert J, Martin BD, Fricke MW, Arneja AS, et al. Disability  
21 and quality of life in Canadian Aboriginal and non-Aboriginal diabetic lower-extremity  
22 amputees. Arch Phys Med Rehab 2005;86(8):1594-602.  
23  
24  
25  
26  
27  
28  
29  
30  
31  
32  
33  
34  
35  
36  
37  
38  
39  
40  
41  
42  
43  
44  
45  
46  
47  
48  
49  
50  
51  
52  
53  
54  
55  
56  
57  
58  
59  
60

## Table

Table 1. Demographic characteristics of First Nations and other people in Ontario with diabetes, 2002 and 2014.

| Demographic characteristic |            | 2002                 |                         | 2014                 |                         |
|----------------------------|------------|----------------------|-------------------------|----------------------|-------------------------|
|                            |            | First Nations people | Other people in Ontario | First Nations people | Other people in Ontario |
| N                          |            | 13,573               | 680,880                 | 23,011               | 1,364,136               |
| Sex                        | Male       | 6,074 (44.8%)        | 354,541 (52.1%)         | 10,687 (46.4%)       | 709,016 (52.0%)         |
|                            | Female     | 7,499 (55.2%)        | 326,339 (47.9%)         | 12,324 (53.6%)       | 655,120 (48.0%)         |
| Age (years)                | 0-19       | 175 (1.3%)           | 7,517 (1.1%)            | 289 (1.3%)           | 11,558 (0.8%)           |
|                            | 20-34      | 1,396 (10.3%)        | 29,581 (4.3%)           | 1,615 (7.0%)         | 42,553 (3.1%)           |
|                            | 35-49      | 4,222 (31.1%)        | 118,063 (17.3%)         | 5,654 (24.6%)        | 190,112 (13.9%)         |
|                            | 50-64      | 5,056 (37.3%)        | 225,880 (33.2%)         | 9,238 (40.1%)        | 472,026 (34.6%)         |
|                            | 65-74      | 1,908 (14.1%)        | 164,265 (24.1%)         | 4,108 (17.9%)        | 337,358 (24.7%)         |
|                            | 75+        | 816 (6.0%)           | 135,574 (19.9%)         | 2,107 (9.2%)         | 310,529 (22.8%)         |
| Rurality                   | Urban      | 3,228 (37.8%)        | 480,927 (71.3%)         | 6,277 (42.6%)        | 989,684 (73.0%)         |
|                            | Semi-urban | 2,780 (32.6%)        | 134,164 (19.9%)         | 4,587 (31.1%)        | 262,062 (19.3%)         |
|                            | Rural      | 2,526 (29.6%)        | 59,893 (8.9%)           | 3,865 (26.2%)        | 103,246 (7.6%)          |
| Comorbidity                | Low        | 3,074 (22.7%)        | 114,536 (17.0%)         | 4,959 (21.7%)        | 246,154 (18.2%)         |
|                            | Medium     | 5,526 (40.9%)        | 295,761 (43.8%)         | 8,850 (38.7%)        | 576,794 (42.6%)         |
|                            | High       | 4,925 (36.4%)        | 265,363 (39.3%)         | 9,086 (39.7%)        | 531,150 (39.2%)         |

1  
2  
3 **Figure headings**  
4  
5

6  
7 Figure 1: Age- and sex-adjusted rates and 95% confidence intervals among First Nations  
8 people and other people in Ontario of A) lower-extremity angiography, B) revascularization  
9 procedures, and C) lower-extremity amputation  
10  
11

12  
13  
14 Figure 2: Age-adjusted rates by sex and sex-adjusted rates by age of lower-extremity  
15 amputation among First Nations people and other people in Ontario, 2014.  
16  
17

18  
19 Figure 3: Adjusted survival curve after major lower-extremity amputation for First Nations people  
20 and other people in Ontario.  
21  
22

23  
24  
25  
26  
27  
28  
29  
30  
31  
32  
33  
34  
35  
36  
37  
38  
39  
40  
41  
42  
43  
44  
45  
46  
47  
48  
49  
50  
51  
52  
53  
54  
55  
56  
57  
58  
59  
60

Confidential

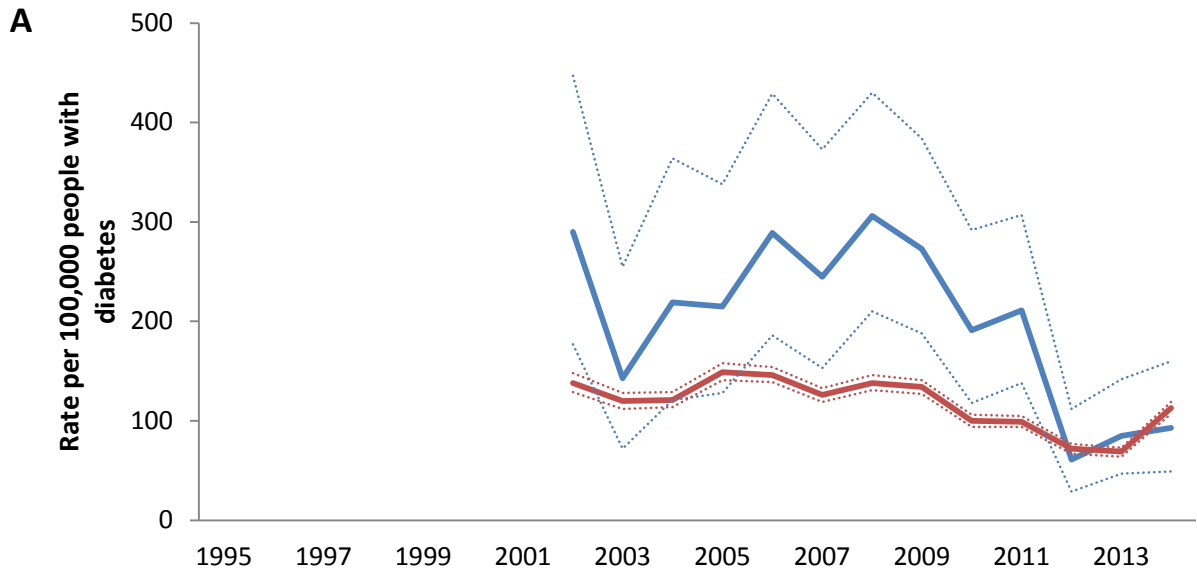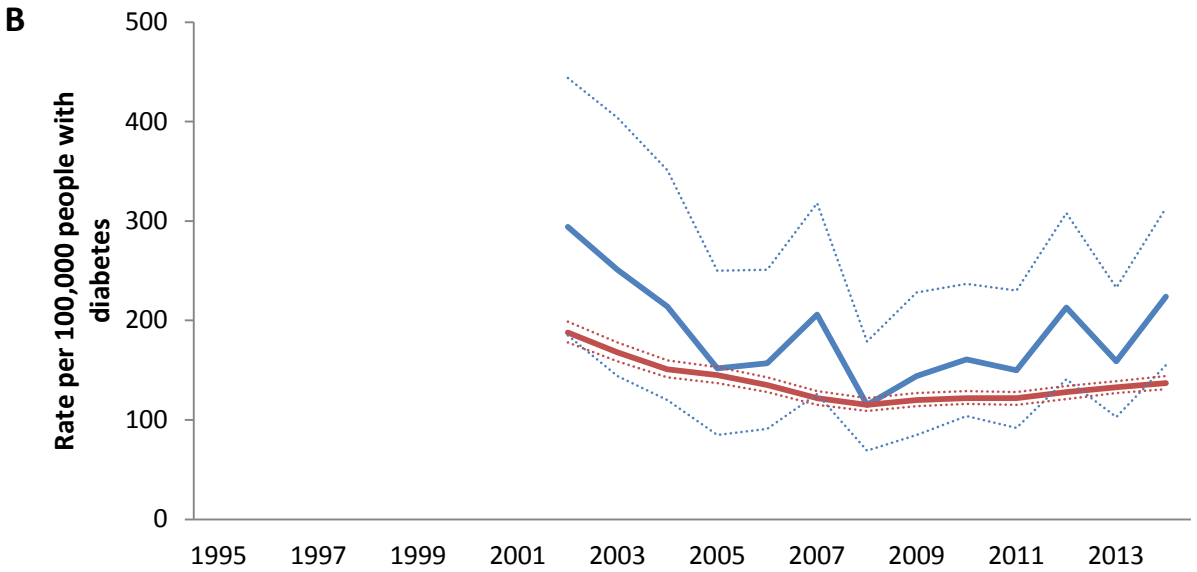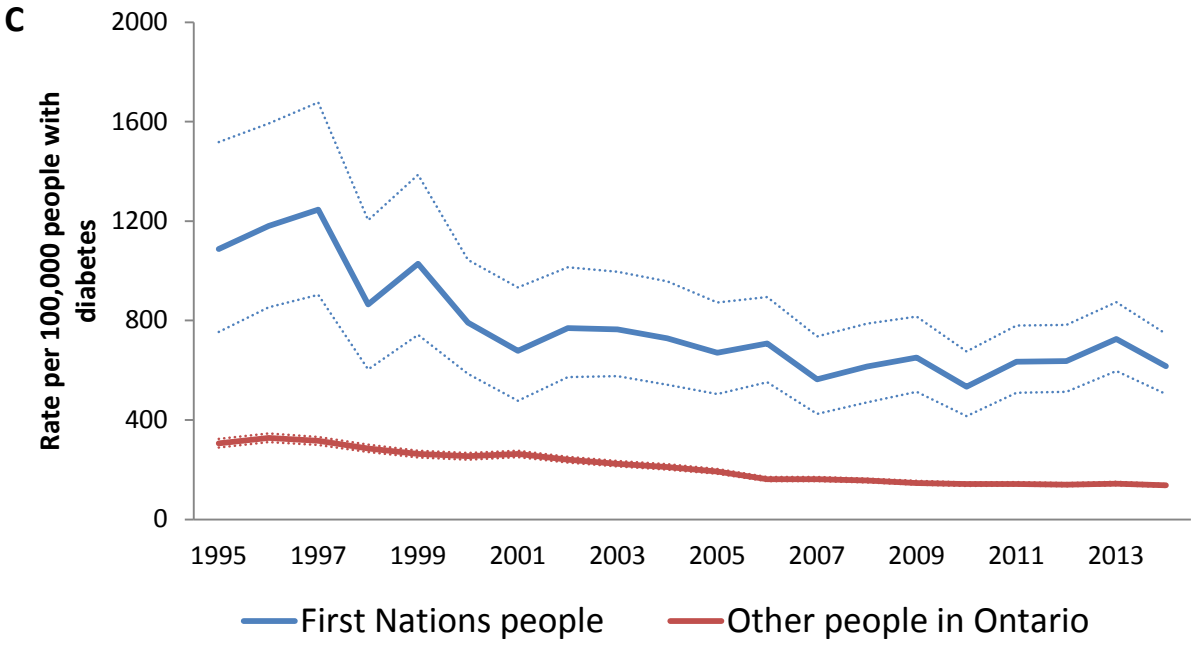

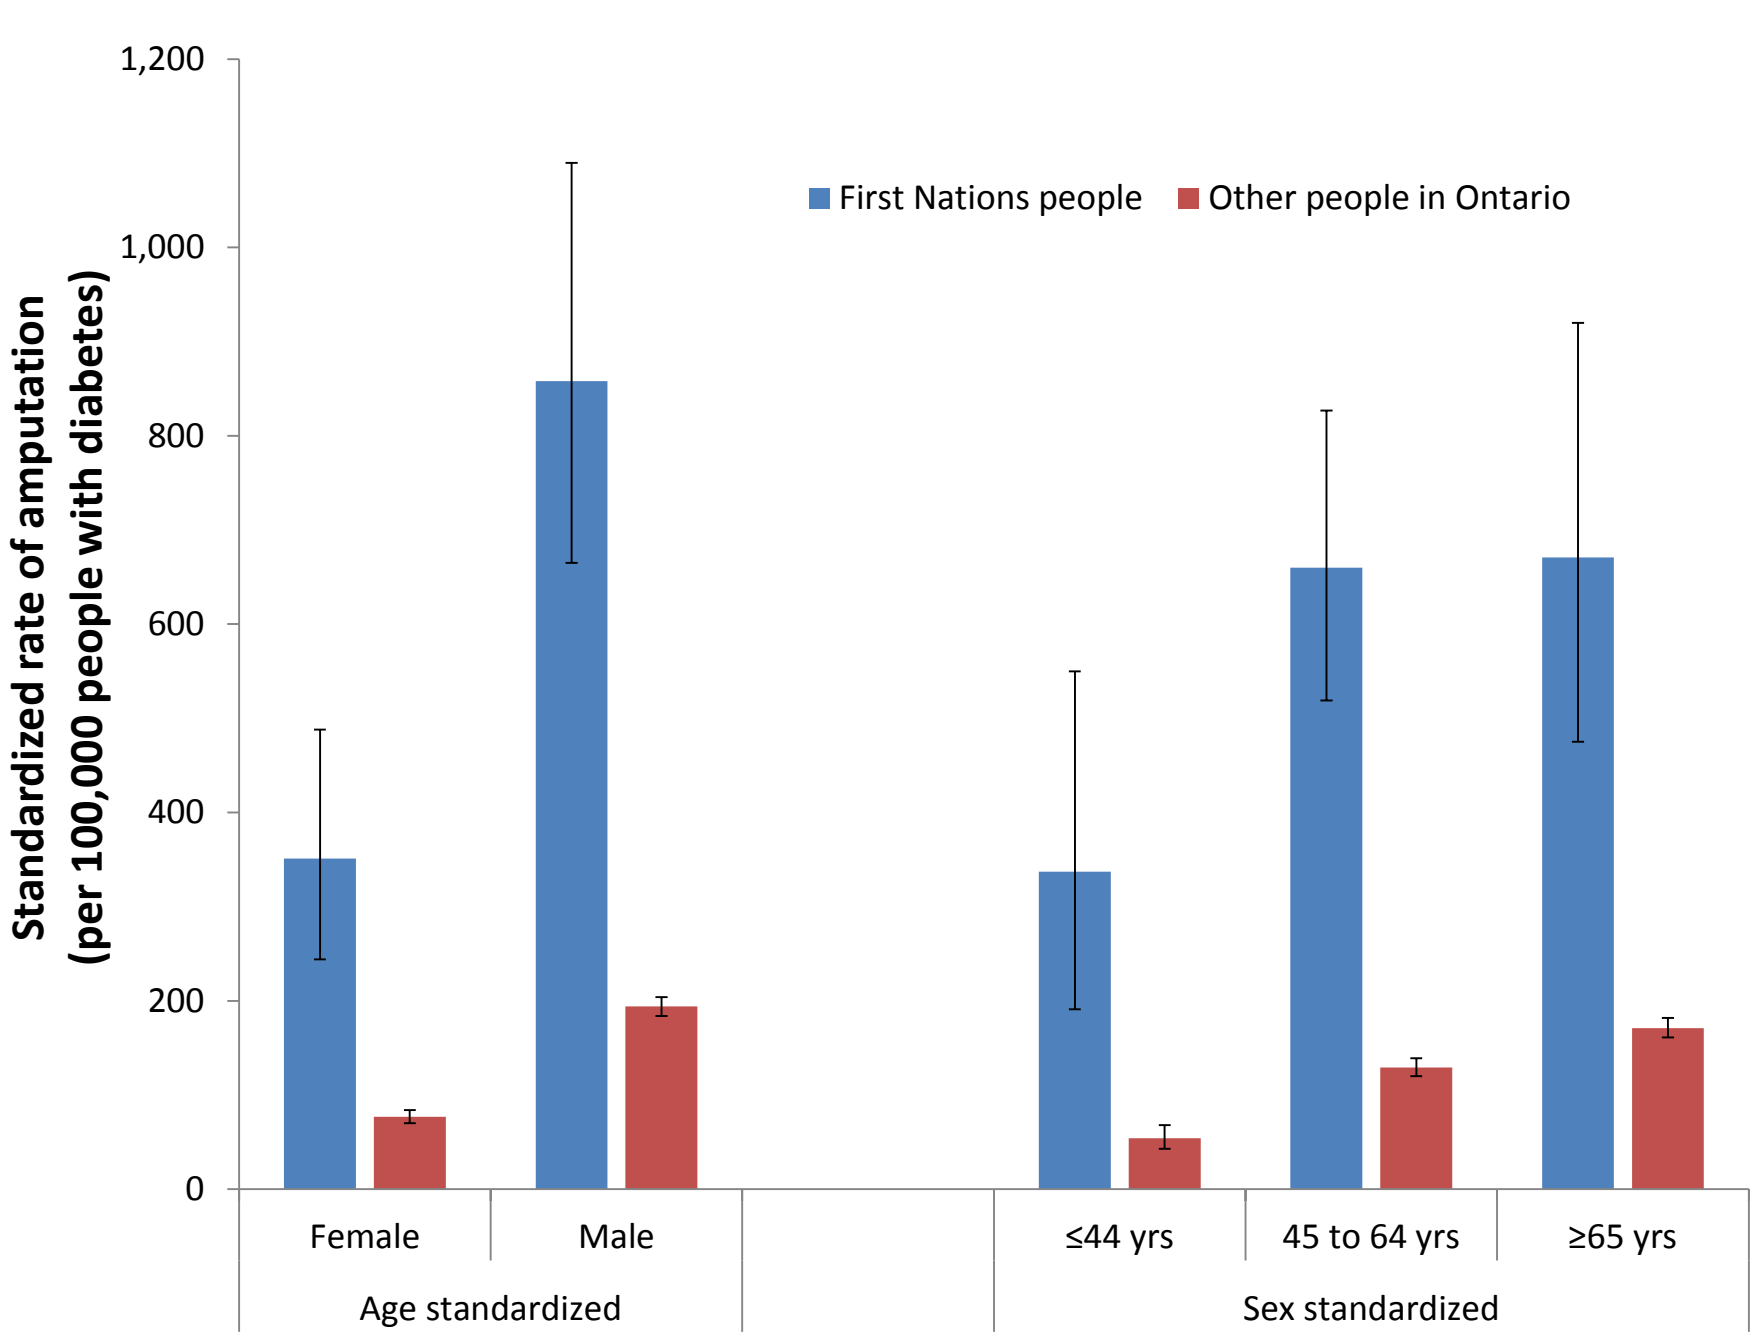

1  
2  
3  
4  
5  
6  
7  
8  
9  
10  
11  
12  
13  
14  
15  
16  
17  
18  
19  
20  
21  
22  
23  
24  
25  
26  
27  
28  
29  
30  
31  
32  
33  
34  
35  
36  
37  
38  
39  
40  
41  
42  
43  
44  
45  
46  
47



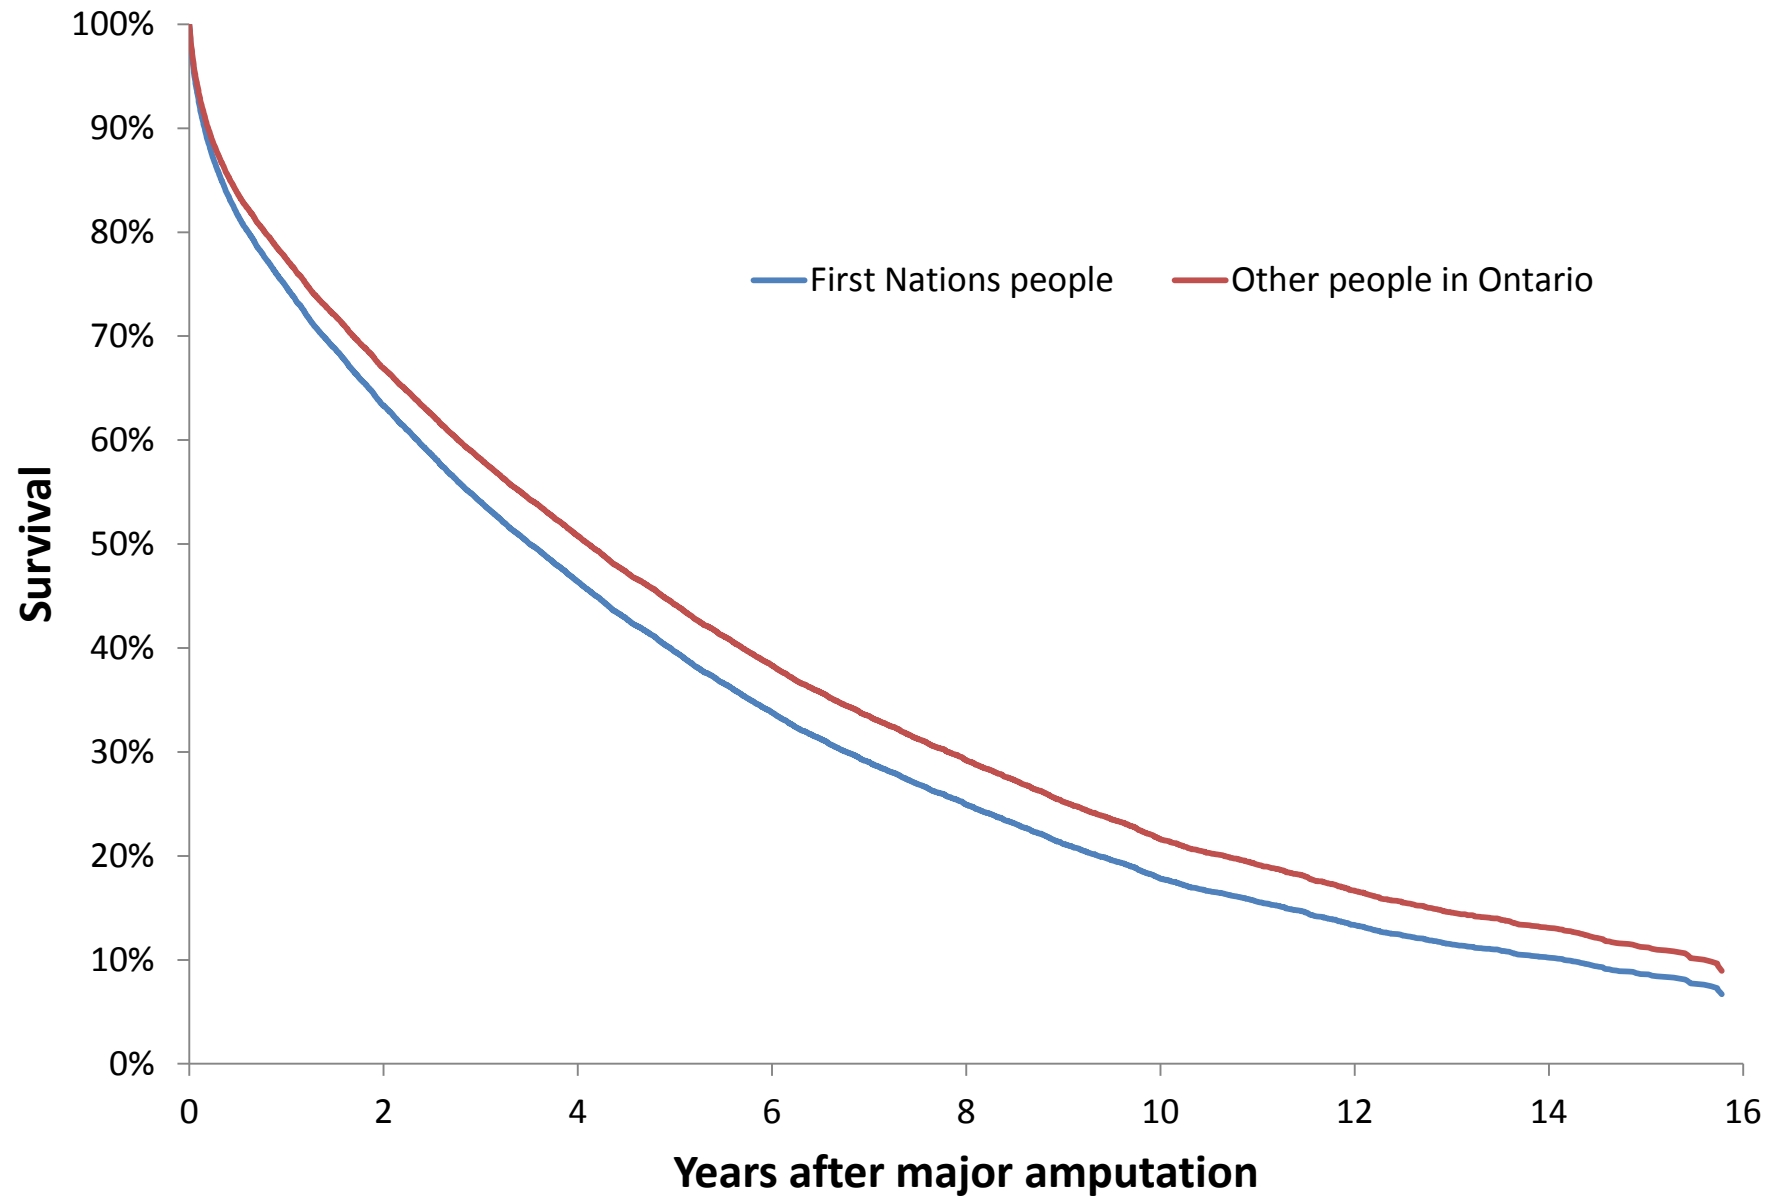

1  
2  
3  
4  
5  
6  
7  
8  
9  
10  
11  
12  
13  
14  
15  
16  
17  
18  
19  
20  
21  
22  
23  
24  
25  
26  
27  
28  
29  
30  
31  
32  
33  
34  
35  
36  
37  
38  
39  
40  
41  
42  
43  
44  
45  
46  
47

STROBE Statement—Checklist of items that should be included in reports of *cohort studies*

|                              | Item No | Recommendation                                                                                                                                                                                                                                                                                                         | Page No       |
|------------------------------|---------|------------------------------------------------------------------------------------------------------------------------------------------------------------------------------------------------------------------------------------------------------------------------------------------------------------------------|---------------|
| <b>Title and abstract</b>    | 1       | (a) Indicate the study's design with a commonly used term in the title or the abstract<br>(b) Provide in the abstract an informative and balanced summary of what was done and what was found                                                                                                                          | 1<br>3        |
| <b>Introduction</b>          |         |                                                                                                                                                                                                                                                                                                                        |               |
| Background/rationale         | 2       | Explain the scientific background and rationale for the investigation being reported                                                                                                                                                                                                                                   | 4             |
| Objectives                   | 3       | State specific objectives, including any prespecified hypotheses                                                                                                                                                                                                                                                       | 4             |
| <b>Methods</b>               |         |                                                                                                                                                                                                                                                                                                                        |               |
| Study design                 | 4       | Present key elements of study design early in the paper                                                                                                                                                                                                                                                                | 4             |
| Setting                      | 5       | Describe the setting, locations, and relevant dates, including periods of recruitment, exposure, follow-up, and data collection                                                                                                                                                                                        | 4-5           |
| Participants                 | 6       | (a) Give the eligibility criteria, and the sources and methods of selection of participants. Describe methods of follow-up<br>(b) For matched studies, give matching criteria and number of exposed and unexposed                                                                                                      | 4-5           |
| Variables                    | 7       | Clearly define all outcomes, exposures, predictors, potential confounders, and effect modifiers. Give diagnostic criteria, if applicable                                                                                                                                                                               | 5             |
| Data sources/<br>measurement | 8*      | For each variable of interest, give sources of data and details of methods of assessment (measurement). Describe comparability of assessment methods if there is more than one group                                                                                                                                   | 5             |
| Bias                         | 9       | Describe any efforts to address potential sources of bias                                                                                                                                                                                                                                                              | 5             |
| Study size                   | 10      | Explain how the study size was arrived at                                                                                                                                                                                                                                                                              | N/A           |
| Quantitative variables       | 11      | Explain how quantitative variables were handled in the analyses. If applicable, describe which groupings were chosen and why                                                                                                                                                                                           | N/A           |
| Statistical methods          | 12      | (a) Describe all statistical methods, including those used to control for confounding<br>(b) Describe any methods used to examine subgroups and interactions<br>(c) Explain how missing data were addressed<br>(d) If applicable, explain how loss to follow-up was addressed<br>(e) Describe any sensitivity analyses | 5             |
| <b>Results</b>               |         |                                                                                                                                                                                                                                                                                                                        |               |
| Participants                 | 13*     | (a) Report numbers of individuals at each stage of study—eg numbers potentially eligible, examined for eligibility, confirmed eligible, included in the study, completing follow-up, and analysed<br>(b) Give reasons for non-participation at each stage<br>(c) Consider use of a flow diagram                        | N/A           |
| Descriptive data             | 14*     | (a) Give characteristics of study participants (eg demographic, clinical, social) and information on exposures and potential confounders<br>(b) Indicate number of participants with missing data for each variable of interest<br>(c) Summarise follow-up time (eg, average and total amount)                         | Table 1       |
| Outcome data                 | 15*     | Report numbers of outcome events or summary measures over time                                                                                                                                                                                                                                                         | 6,<br>Figures |

|    |                          |    |                                                                                                                                                                                                              |     |
|----|--------------------------|----|--------------------------------------------------------------------------------------------------------------------------------------------------------------------------------------------------------------|-----|
| 1  | Main results             | 16 | (a) Give unadjusted estimates and, if applicable, confounder-adjusted estimates and their precision (eg, 95% confidence interval). Make clear which confounders were adjusted for and why they were included | 6   |
| 2  |                          |    | (b) Report category boundaries when continuous variables were categorized                                                                                                                                    |     |
| 3  |                          |    | (c) If relevant, consider translating estimates of relative risk into absolute risk for a meaningful time period                                                                                             |     |
| 4  |                          |    |                                                                                                                                                                                                              |     |
| 5  |                          |    |                                                                                                                                                                                                              |     |
| 6  |                          |    |                                                                                                                                                                                                              |     |
| 7  |                          |    |                                                                                                                                                                                                              |     |
| 8  |                          |    |                                                                                                                                                                                                              |     |
| 9  | Other analyses           | 17 | Report other analyses done—eg analyses of subgroups and interactions, and sensitivity analyses                                                                                                               | N/A |
| 10 |                          |    |                                                                                                                                                                                                              |     |
| 11 | <b>Discussion</b>        |    |                                                                                                                                                                                                              |     |
| 12 |                          |    |                                                                                                                                                                                                              |     |
| 13 | Key results              | 18 | Summarise key results with reference to study objectives                                                                                                                                                     | 6-7 |
| 14 | Limitations              | 19 | Discuss limitations of the study, taking into account sources of potential bias or imprecision. Discuss both direction and magnitude of any potential bias                                                   | 8   |
| 15 |                          |    |                                                                                                                                                                                                              |     |
| 16 | Interpretation           | 20 | Give a cautious overall interpretation of results considering objectives, limitations, multiplicity of analyses, results from similar studies, and other relevant evidence                                   | 8-9 |
| 17 |                          |    |                                                                                                                                                                                                              |     |
| 18 |                          |    |                                                                                                                                                                                                              |     |
| 19 | Generalisability         | 21 | Discuss the generalisability (external validity) of the study results                                                                                                                                        | 8   |
| 20 |                          |    |                                                                                                                                                                                                              |     |
| 21 | <b>Other information</b> |    |                                                                                                                                                                                                              |     |
| 22 | Funding                  | 22 | Give the source of funding and the role of the funders for the present study and, if applicable, for the original study on which the present article is based                                                | 2   |
| 23 |                          |    |                                                                                                                                                                                                              |     |
| 24 |                          |    |                                                                                                                                                                                                              |     |

\*Give information separately for exposed and unexposed groups.

**Note:** An Explanation and Elaboration article discusses each checklist item and gives methodological background and published examples of transparent reporting. The STROBE checklist is best used in conjunction with this article (freely available on the Web sites of PLoS Medicine at <http://www.plosmedicine.org/>, Annals of Internal Medicine at <http://www.annals.org/>, and Epidemiology at <http://www.epidem.com/>). Information on the STROBE Initiative is available at <http://www.strobe-statement.org>.
